# Supplementary figures and images for: Glucose restriction drives spatial reorganization of mevalonate metabolism
Source: eLife journal article supplement (doi:10.7554/elife.62591), 2021-04-07

**A**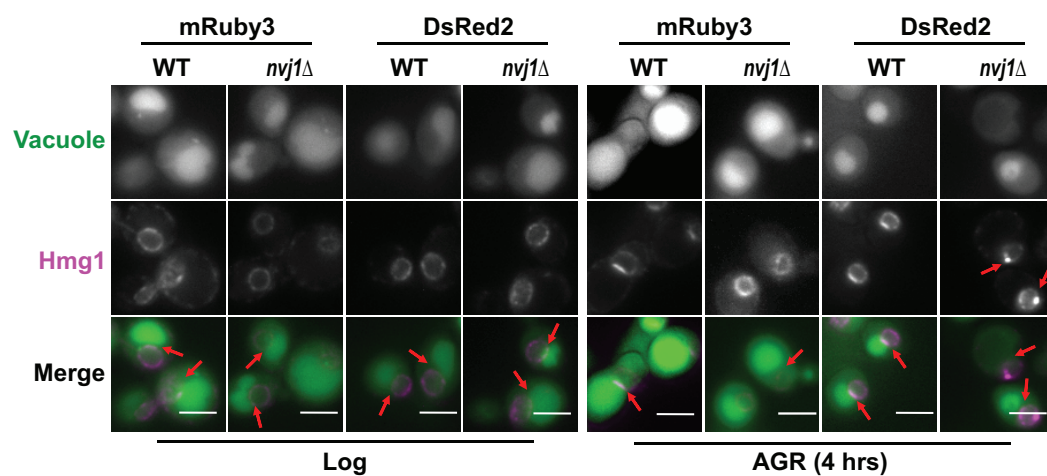**B**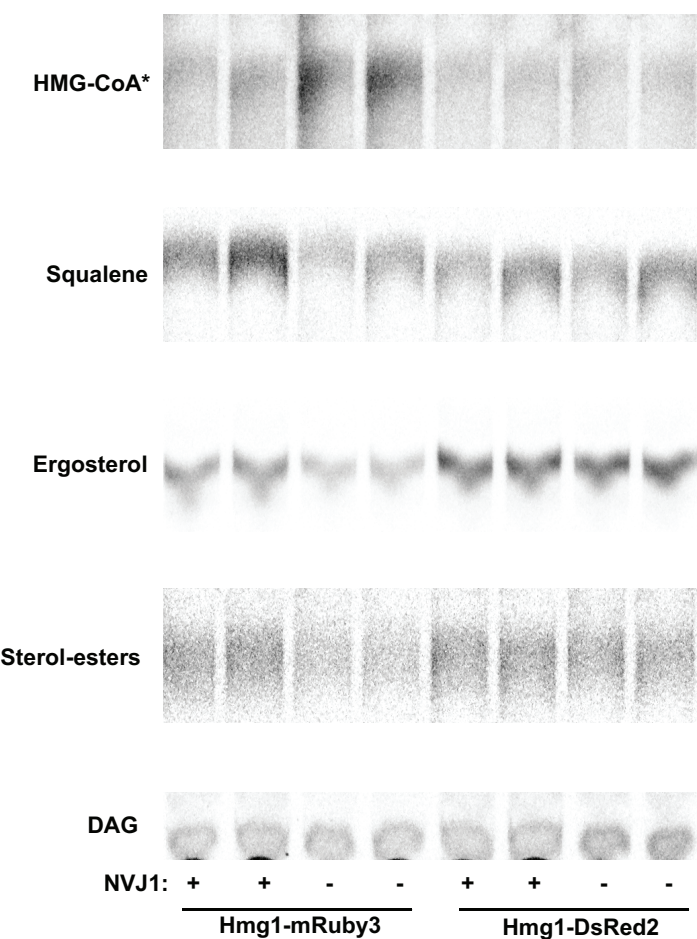**C**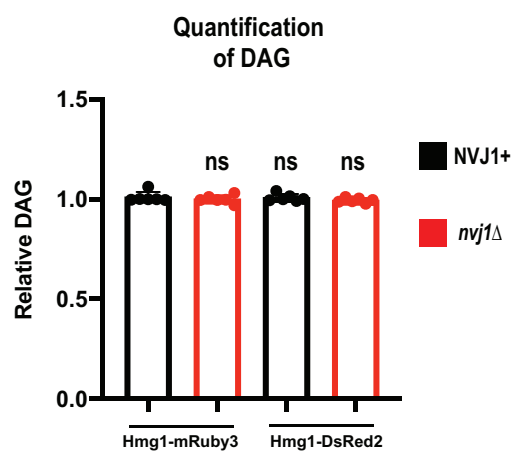**D**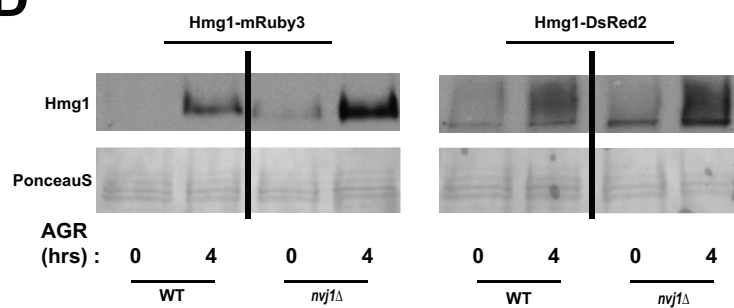**E**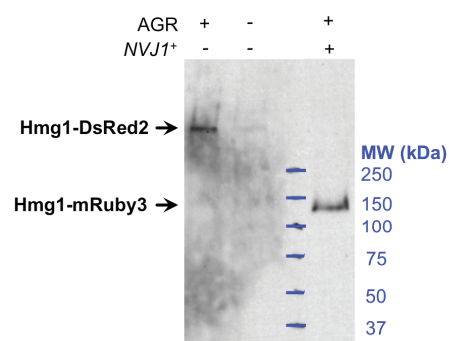

Figure 7-figure supplement 1

Supplement: supp [file elife-62591-supp-v1.zip]

**A**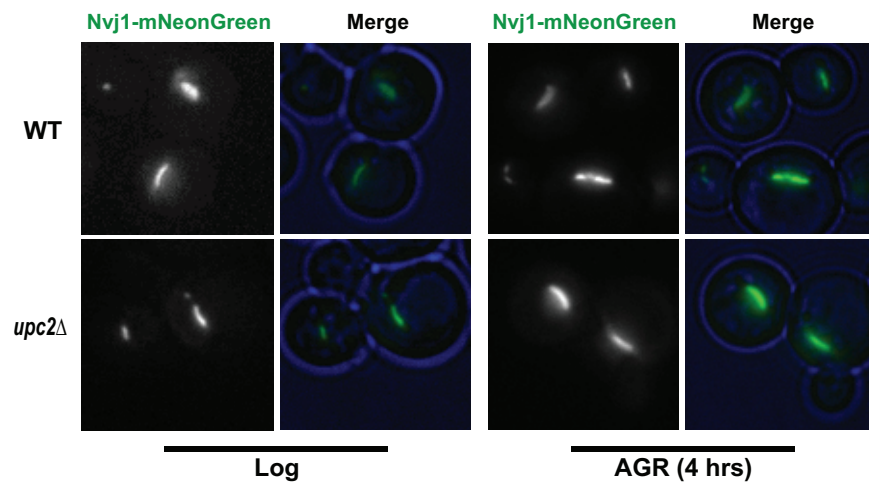**B**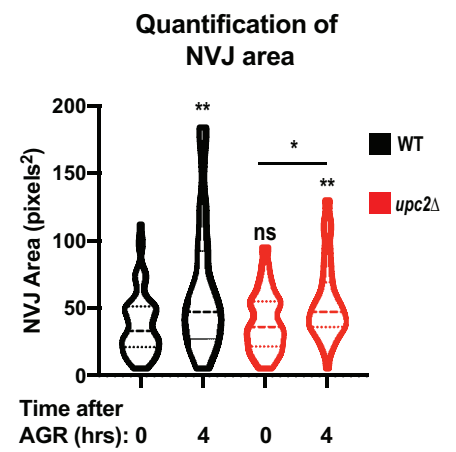**D**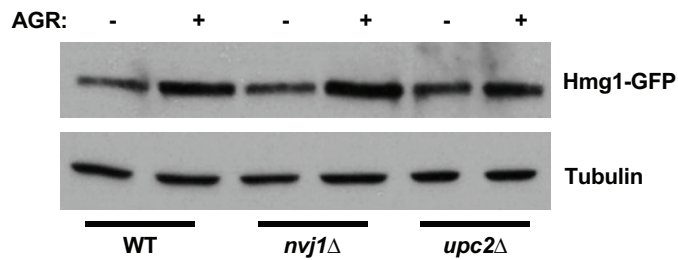**C**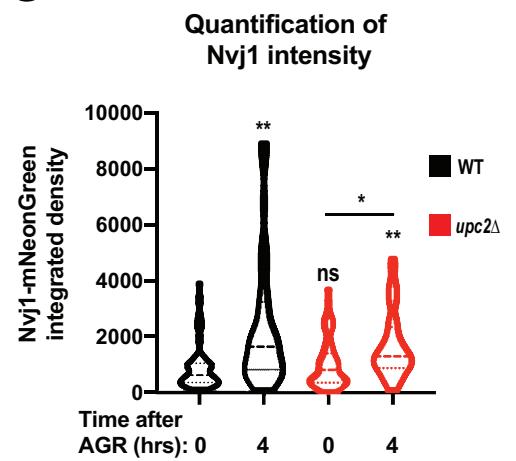

**Figure 4-figure supplement 1**

Supplement: supp [file elife-62591-supp-v1.zip]

**A**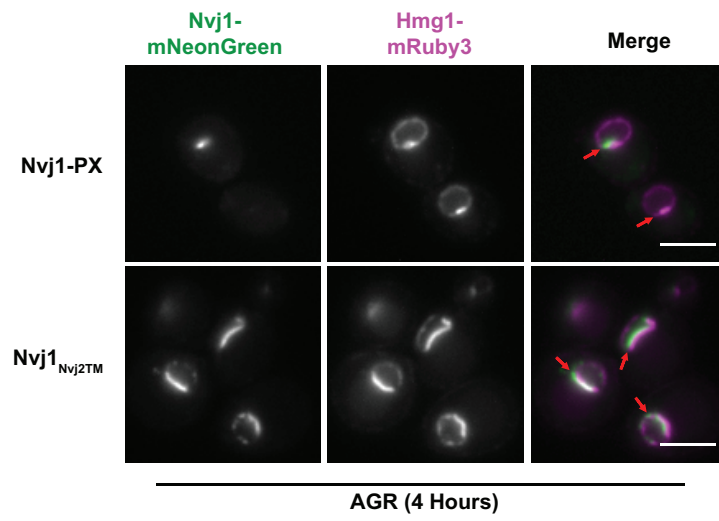

Supplement: supp [file elife-62591-supp-v1.zip]

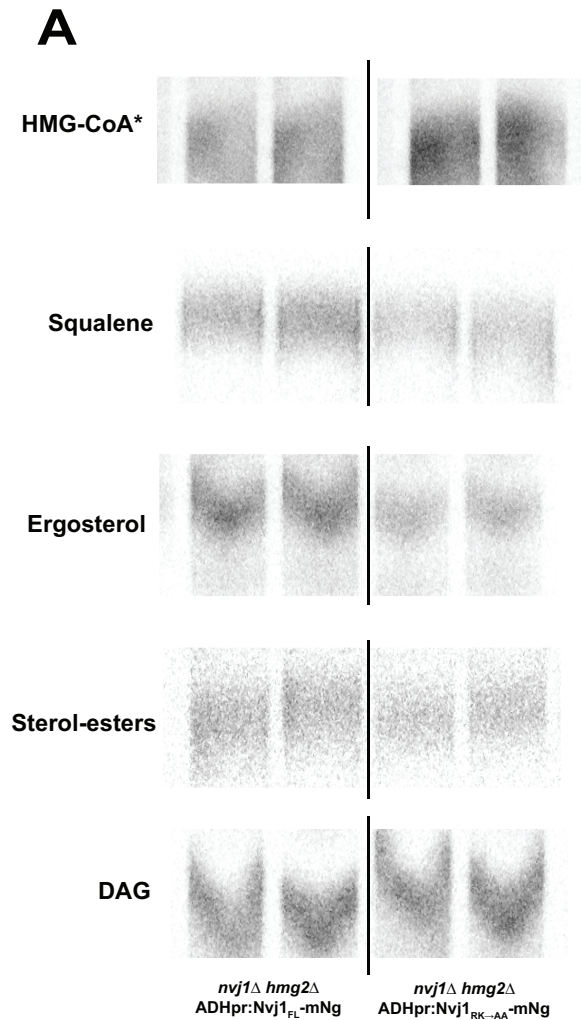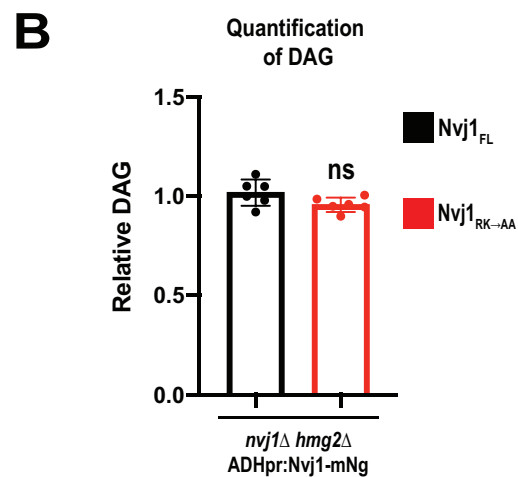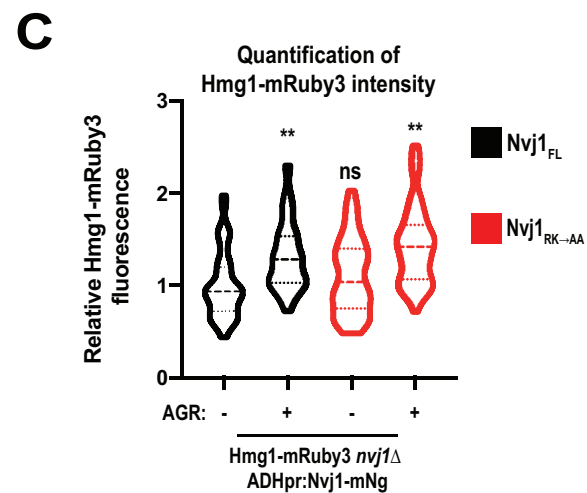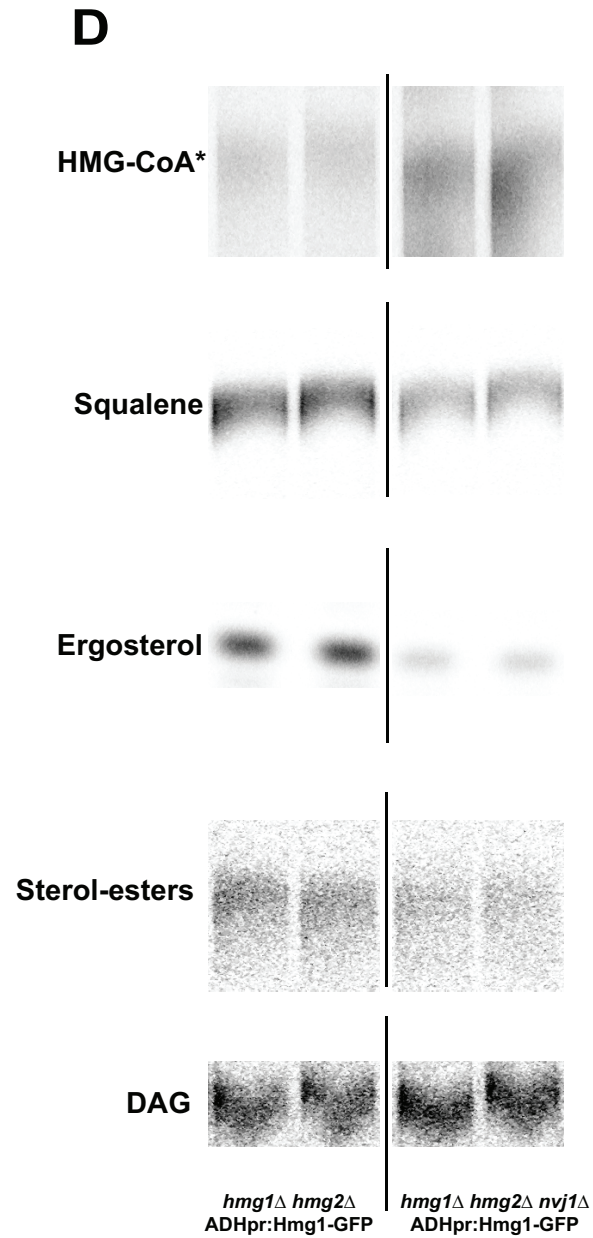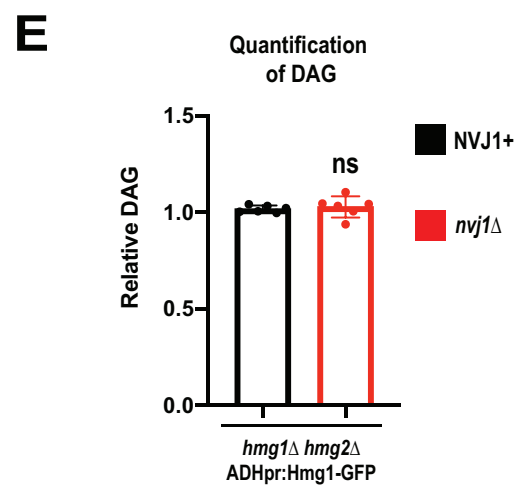

Figure 6-figure supplement 1

Supplement: supp [file elife-62591-supp-v1.zip]

**A**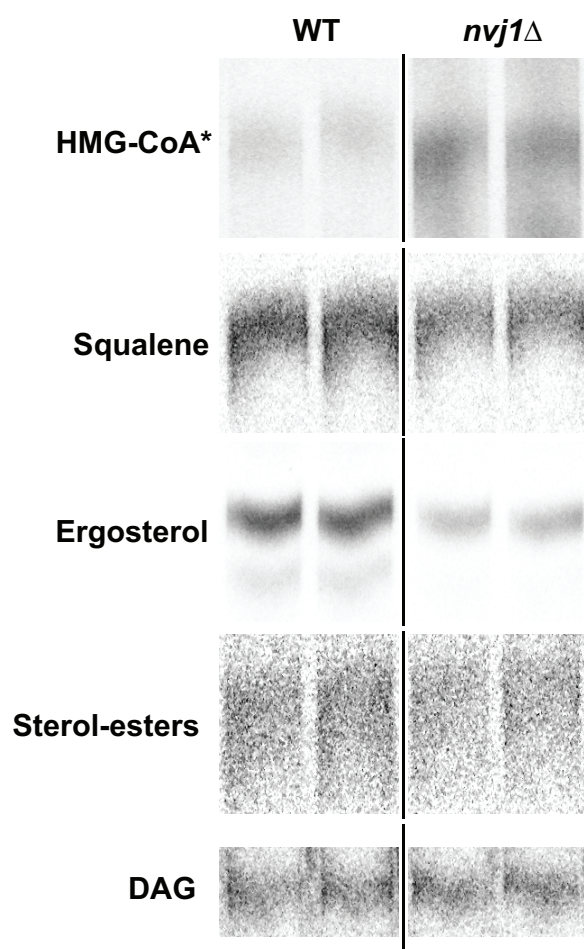**B**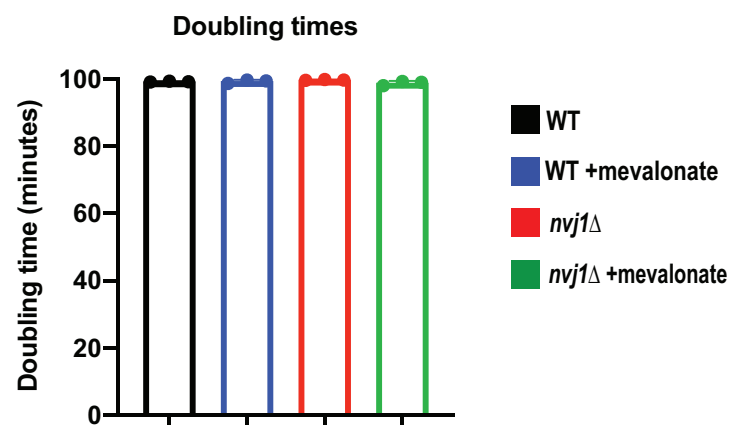

Figure 5-figure supplement 1

Supplement: supp [file elife-62591-supp-v1.zip]
